# Supplementary material
Source: ML conference proceedings conference paper supplement (https://proceedings.mlr.press/v130/xu21g.html)
Supplement: Supplementary file 1 [file xu21g-supp.pdf]

## A BI-MAML Algorithm

---

**Algorithm 2** Biphasic MAML (BI-MAML)
 

---

**Input:** Loss functions  $\{f_i(w)\}_{i \in [M]}$ , MAML parameter  $\alpha$ , step size  $\beta$ , tolerance level  $\varepsilon_0, \varepsilon$ .

- 1: **initialize**  $w(0) \in \mathbb{R}^d$  arbitrarily
- 2: **for**  $t \in \mathbb{N} \cup \{0\}$  **do**
- 3:     **if**  $\|\nabla f(w(t))\| \geq \varepsilon_0$  **then**
- 4:          $w(t+1) \leftarrow w(t) - \beta \nabla f(w(t))$
- 5:     **else**
- 6:          $w(t+1) \leftarrow w(t) - \beta \nabla F(w(t))$
- 7:     **end if**
- 8:     **return**  $w(t+1)$  if  $\|\nabla F(w(t))\| \leq \varepsilon$
- 9: **end for**

---

## B Proof of Proposition 3.1

*Proof.* Recall the MAML algorithm with update Eq. (3.1), *i.e.*,

$$w^+ = w - \beta \nabla F(w),$$

and that  $\nabla F_i(w) = (I_d - \alpha \nabla^2 f_i(w)) \nabla f_i(w - \alpha \nabla f_i(w))$ . Expand the terms to get

$$\begin{aligned} \nabla F(w) &= \mathbb{E}_{i \sim p} [(I_d - \alpha \nabla^2 f_i(w)) \nabla f_i(w - \alpha \nabla f_i(w))] \\ &= \mathbb{E}_{i \sim p} \nabla f_i(w - \alpha \nabla f_i(w)) - \alpha \mathbb{E}_{i \sim p} \nabla^2 f_i(w) \nabla f_i(w - \alpha \nabla f_i(w)) \\ &= \mathbb{E}_{i \sim p} (I_d - \alpha \nabla^2 f_i(\tilde{w}_i)) \nabla f_i(w) - \alpha \mathbb{E}_{i \sim p} \nabla^2 f_i(w) (I_d - \alpha \nabla^2 f_i(\tilde{w}_i)) \nabla f_i(w) \\ &= \mathbb{E}_{i \sim p} (I_d - \alpha \nabla^2 f_i(w)) (I_d - \alpha \nabla^2 f_i(\tilde{w}_i)) \nabla f_i(w) \\ &= \mathbb{E}_{i \sim p} A_i(w) A_i(\tilde{w}_i) \nabla f_i(w), \end{aligned}$$

where the first equality follows from definition, the third equality follows from mean value theorem. Here  $\tilde{w}_i$  is a value between  $w$  and  $w - \alpha \nabla f_i(w)$  such that mean value theorem holds. The formula can be further recast into

$$\begin{aligned} \nabla F(w) &= \mathbb{E}_{i \sim p} [\nabla f_i(w) - \alpha (\nabla^2 f_i(w) + \nabla^2 f_i(\tilde{w}_i)) \nabla f_i(w) + \alpha^2 \nabla^2 f_i(w) \nabla^2 f_i(\tilde{w}_i) \nabla f_i(w)] \\ &= \nabla f(w) - \mathbb{E}_{i \sim p} [(\alpha (\nabla^2 f_i(w) + \nabla^2 f_i(\tilde{w}_i)) - \alpha^2 \nabla^2 f_i(w) \nabla^2 f_i(\tilde{w}_i)) \nabla f_i(w)]. \end{aligned}$$

If we think of the infinitesimal step size  $\beta \rightarrow 0$ , we obtain an ODE that represents the gradient flow on  $F(w)$ :

$$\begin{aligned} \dot{w} &= -\nabla F(w) \\ &= -\nabla f(w) + \mathbb{E}_{i \sim p} \underbrace{[(\alpha (\nabla^2 f_i(w) + \nabla^2 f_i(\tilde{w}_i)) - \alpha^2 \nabla^2 f_i(w) \nabla^2 f_i(\tilde{w}_i)) \nabla f_i(w)]}_{B_i(w)}. \end{aligned}$$

We define a shorthand  $B_i(w)$  for notational convenience. □

## C Proof of the Convergent Upper Bound

**Lemma C.1.** *If the loss function  $f_i(w)$  satisfies Assumptions 3.2 and 3.3 and  $\alpha < \frac{1}{2L}$ , then it holds that*

$$\nabla f(w)^\top \nabla^2 f(w) \mathbb{E}_{i \sim p} [B_i(w) \nabla f_i(w)] \leq \frac{5}{4} L^2 \alpha (L^3 \alpha^2 + 2L^2 \alpha + 2) \|\nabla f(w)\|^2 + \frac{\sigma^2}{2}. \quad (\text{C.1})$$

*Proof.* Another upper bound for the third term on the right-hand side of Eq. (3.6) can be derived through relaxing its difference with the quadratic form

$$\begin{aligned} &\nabla f(w)^\top \nabla^2 f(w) \mathbb{E}_{i \sim p} [B_i(w) \nabla f_i(w)] - \nabla f(w)^\top \nabla^2 f(w) \mathbb{E}_{i \sim p} [B_i(w)] \nabla f(w) \\ &= \mathbb{E}_{i \sim p} [\nabla f(w)^\top \nabla^2 f(w) B_i(w) (\nabla f_i(w) - \nabla f(w))] \\ &\leq \frac{1}{2} \mathbb{E}_{i \sim p} \|B_i(w)^\top \nabla^2 f(w) \nabla f(w)\|^2 + \frac{1}{2} \mathbb{E}_{i \sim p} \|\nabla f_i(w) - \nabla f(w)\|^2, \end{aligned}$$

where the last inequality follows from Young's inequality. This provides yet another upper bound after rearranging the terms as follows:

$$\begin{aligned} \nabla f(w)^\top \nabla^2 f(w) \mathbb{E}_{i \sim p} [B_i(w) \nabla f_i(w)] &\leq \nabla f(w)^\top \nabla^2 f(w) \mathbb{E}_{i \sim p} [B_i(w)] \nabla f(w) \\ &\quad + \frac{L^2}{2} \max_i \|B_i(w)\|^2 \|\nabla f(w)\|^2 + \frac{\sigma^2}{2} \\ &\leq \left( L \max_i \|B_i(w)\| + \frac{L^2}{2} \max_i \|B_i(w)\|^2 \right) \|\nabla f(w)\|^2 + \frac{\sigma^2}{2}. \end{aligned}$$

The first and second inequality are due to Assumptions 3.2 and 3.4. Recall that

$$B_i(w) = \alpha(\nabla^2 f_i(w) + \nabla^2 f_i(\tilde{w}_i)) - \alpha^2 \nabla^2 f_i(w) \nabla^2 f_i(\tilde{w}_i),$$

and it is not hard to see that  $\max_i \|B_i(w)\| \leq 2\alpha L + \alpha^2 L^2$ . Hence we conclude that

$$\begin{aligned} \nabla f(w)^\top \nabla^2 f(w) \mathbb{E}_{i \sim p} [B_i(w) \nabla f_i(w)] &\leq \left( L \max_i \|B_i(w)\| + \frac{L^2}{2} \max_i \|B_i(w)\|^2 \right) \|\nabla f(w)\|^2 + \frac{\sigma^2}{2} \\ &\leq \frac{1}{2} L^2 \alpha (L\alpha + 2) (L^3 \alpha^2 + 2L^2 \alpha + 2) \|\nabla f(w)\|^2 + \frac{\sigma^2}{2} \\ &\leq \frac{5}{4} L^2 \alpha (L^3 \alpha^2 + 2L^2 \alpha + 2) \|\nabla f(w)\|^2 + \frac{\sigma^2}{2}, \end{aligned}$$

where the last inequality follows from  $\alpha < \frac{1}{2L}$ . □

### Proof of Lemma 3.7

*Proof.* Plug Eq. (C.1) into Eq. (3.6) to get

$$\begin{aligned} \frac{d}{dt} \frac{1}{2} \|\nabla f(w)\|^2 &\leq -\nabla f(w)^\top \nabla^2 f(w) \nabla f(w) + \frac{5}{4} L^2 \alpha (L^3 \alpha^2 + 2L^2 \alpha + 2) \|\nabla f(w)\|^2 + \frac{\sigma^2}{2} \\ &\leq -\left( \mu - \frac{5}{4} L^2 \alpha (L^3 \alpha^2 + 2L^2 \alpha + 2) \right) \|\nabla f(w)\|^2 + \frac{\sigma^2}{2}. \end{aligned}$$

□

**Theorem C.2.** *If it holds that*

$$\alpha < \min \left\{ \sqrt[3]{\frac{2}{15}} \mu^{1/3} L^{-5/3}, \sqrt{\frac{1}{15}} \mu^{1/2} L^{-2}, \sqrt{\frac{1}{15}} \mu L^{-2} \right\},$$

then  $\|\nabla f(w(t))\|^2$  under (3.2) is upper bounded by a function  $y(t)$  that is exponentially convergent to

$$\frac{\sigma^2}{2\mu - \frac{5}{2} L^2 \alpha (L^3 \alpha^2 + 2L^2 \alpha + 2)} < \frac{\sigma^2}{\mu}$$

as  $t \rightarrow \infty$ .

*Proof.* If  $y(t)$  is the solution of an IVP

$$\dot{y} \leq -\left( \mu - \frac{5}{4} L^2 \alpha (L^3 \alpha^2 + 2L^2 \alpha + 2) \right) y + \frac{\sigma^2}{2}$$

with initial condition  $y(0) = \|\nabla f(w(0))\|^2$ , then  $\|\nabla f(w(t))\|^2 \leq y(t)$  for any  $t \geq 0$ . Moreover, it is an ODE of the following form:  $\dot{y} = -\zeta y + \gamma$ , which is a simple first-order separable ODE that permits a family of solutions

$$y(t) = (e^{-\zeta(t+c_0)} + \gamma)/\zeta$$

under the condition  $y(0) > \gamma/\zeta$ . In our case,  $\zeta = \mu - \frac{5}{4}L^2\alpha(L^3\alpha^2 + 2L^2\alpha + 2)$ ,  $\gamma = \frac{\sigma^2}{2}$ , and the constant  $c_0$  depends on initial condition  $y(0)$ . Consequently, we have  $y$  converges to  $\gamma/\zeta$  exponentially whenever  $\zeta > 0$ . The following theorem provides sufficient conditions for convergence.

We derive sufficient conditions for the quadratic inequality  $\frac{1}{2}\mu - \frac{5}{4}L^2\alpha(L^3\alpha^2 + 2L^2\alpha + 2) > 0$ , *i.e.*,

$$\frac{5}{4}L^5\alpha^3 < \frac{\mu}{6}, \quad \frac{5}{2}L^4\alpha^2 < \frac{\mu}{6}, \quad \frac{5}{2}L^2\alpha < \frac{\mu}{6}.$$

The sufficient conditions reduce to

$$\alpha < \min \left\{ \sqrt[3]{\frac{2}{15}\mu^{1/3}L^{-5/3}}, \sqrt{\frac{1}{15}\mu^{1/2}L^{-2}}, \sqrt{\frac{1}{15}\mu L^{-2}} \right\}$$

and we have

$$\frac{\gamma}{\zeta} < \frac{\sigma^2/2}{\mu/2} = \frac{\sigma^2}{\mu}.$$

□

**Lemma C.3.** *Suppose the loss function  $f_i(w)$  satisfies Assumptions 3.2 and 3.4, then for any  $w \in \mathbb{R}^d$  such that  $\|\nabla f(w)\| \leq G$ , it holds that  $\|\nabla F(w)\| \leq (1 + 2\alpha L + \alpha^2 L^2)G + (2\alpha L + \alpha^2 L^2)\sigma$ .*

*Proof.* Recall that  $\nabla F_i(w) = A_i(w)\nabla f_i(w - \alpha\nabla f_i(w))$ . Apply mean value theorem to  $\nabla f_i(w - \alpha\nabla f_i(w))$  to get

$$\begin{aligned} \nabla f_i(w - \alpha\nabla f_i(w)) &= \nabla f_i(w) - \alpha\nabla^2 f(\tilde{w}_i)\nabla f_i(w) \\ &= A_i(\tilde{w}_i)\nabla f_i(w), \end{aligned} \tag{C.2}$$

where  $\tilde{w}_i$  lies between  $w$  and  $w - \alpha\nabla f_i(w)$ . Consequently,  $\nabla F_i(w) = A_i(w)A_i(\tilde{w}_i)\nabla f_i(w)$ . Further notice that

$$\begin{aligned} \|\nabla F(w)\| &= \|\mathbb{E}_{i \sim p} \nabla F_i(w)\| \\ &= \|\mathbb{E}_{i \sim p} [\nabla f_i(w) + (\nabla F_i(w) - \nabla f_i(w))]\| \\ &\leq \|\mathbb{E}_{i \sim p} \nabla f_i(w)\| + \|\mathbb{E}_{i \sim p} [(I - A_i(w)A_i(\tilde{w}_i))\nabla f_i(w)]\| \\ &\leq \|\nabla f(w)\| + \mathbb{E}_{i \sim p} [\|I_d - A_i(w)A_i(\tilde{w}_i)\| \|\nabla f_i(w)\|], \end{aligned}$$

The second equality follows from separating the difference between  $\nabla F(w)$  and  $\nabla f(w)$ . The third inequality is due to Eq. (C.2) and triangular inequality. The last inequality is due to Cauchy-Schwarz inequality, and the product of the two norms can be handled separately. Expand  $A_i(w)$ ,  $A_i(\tilde{w}_i)$  and bound the first term by a constant to get

$$\|I_d - A_i(w)A_i(\tilde{w}_i)\| = \|\alpha^2\nabla^2 f_i(w)\nabla^2 f_i(\tilde{w}) - \alpha\nabla^2 f_i(w) - \alpha\nabla^2 f_i(\tilde{w})\| \leq 2\alpha L + \alpha^2 L^2.$$

The remaining term can be bounded by variance  $\sigma$  and gradient norm  $\|\nabla f(w)\|$ :

$$\begin{aligned} \mathbb{E}_{i \sim p} \|\nabla f_i(w)\| &\leq \|\mathbb{E}_{i \sim p} \nabla f_i(w)\| + \mathbb{E}_{i \sim p} [\|\nabla f_i(w) - \mathbb{E}_{i \sim p} \nabla f_i(w)\|] \\ &\leq \|\nabla f(w)\| + \sqrt{\mathbb{E}_{i \sim p} [\|\nabla f_i(w) - \nabla f(w)\|^2]} \\ &\leq \|\nabla f(w)\| + \sigma. \end{aligned}$$

The second inequality follows from Jenson inequality. Combining the upper bounds together yields

$$\|\nabla F(w)\| \leq (1 + 2\alpha L + \alpha^2 L^2)\|\nabla f(w)\| + (2\alpha L + \alpha^2 L^2)\sigma.$$

□

**Proof of Theorem 4.1**

*Proof.* Since the expected loss  $f$  is  $\mu$ -strongly convex, we always have in the first stage that

$$\begin{aligned} \frac{d}{dt} \|\nabla f(w)\|^2 &= \nabla f(w)^\top \nabla^2 f(w) \dot{w} \\ &= -\nabla f(w)^\top \nabla^2 f(w) \nabla F(w) \\ &\leq -\mu \|\nabla f(w)\|^2, \end{aligned}$$

where  $\dot{w} = -\nabla f(w)$ . It reaches a tolerant level at  $\|\nabla f(w)\| \leq \varepsilon_0$ , as long as

$$\begin{aligned} t &\geq \frac{1}{\mu} \log \left( \frac{\|\nabla f(w(0))\|^2}{\varepsilon_0^2} \right) \\ &= \frac{2}{\mu} \log \left( \frac{\|\nabla f(w(0))\|}{\varepsilon_0} \right). \end{aligned}$$

Let us denote

$$t_1 = \min_t \{t : \|\nabla f(w(t))\|^2 \leq \varepsilon_0^2\},$$

By Lemma C.3 and the assumption  $\alpha \leq \frac{1}{2L}$  we have

$$\begin{aligned} \|\nabla F(w(t_1))\| &\leq (1 + 2\alpha L + \alpha^2 L^2) \varepsilon_0 + (2\alpha L + \alpha^2 L^2) \sigma \\ &\leq \frac{9}{4} \varepsilon_0 + \frac{5}{4} \sigma. \end{aligned}$$

Let us denote  $K = \frac{9}{4} \varepsilon_0 + \frac{5}{4} \sigma$ , and Theorem 3.8 implies that if  $\alpha \leq \min\{\frac{1}{2L}, \frac{7\mu}{8\kappa(16K+9\sigma)}\}$  the MAML loss  $F(w)$  is  $\frac{\mu}{8}$ -strongly convex at  $w$ , and the MAML ODE (3.2) after time  $t_1$  is a gradient flow on a  $\frac{\mu}{8}$ -strongly convex loss  $F(w)$ . This dynamics then converges exponentially fast to an approximate stationary point  $\hat{w}$  where  $\|\nabla F(\hat{w})\| \leq \varepsilon$ . Similar to the proof of Theorem 3.6, a sufficient condition for the approximate stationary point  $\hat{w}$  writes  $e^{-\mu\tau/8} \|\nabla F(w(t_1))\|^2 \leq \varepsilon$ , which means  $w(\tau + t_1)$  is an approximate stationary point if

$$\begin{aligned} \tau &\geq \frac{8}{\mu} \log \left( \frac{\|\nabla F(w(t_1))\|^2}{\varepsilon^2} \right) \\ &= \frac{16}{\mu} \log \left( \frac{9\varepsilon_0 + 5\sigma}{4\varepsilon} \right). \end{aligned}$$

Combine two parts together to get the major result that the BI-MAML ODE converges to an approximate stationary point  $\hat{w}(t)$  within

$$t = \frac{1}{\mu} \mathcal{O} \left[ \log \left( \frac{(9\varepsilon_0 + 5\sigma) \|\nabla f(w(0))\|}{4\varepsilon_0 \varepsilon} \right) \right].$$

□

**D Proof of Strong Convexity**

**Lemma D.1.** *Suppose the loss function  $f_i(w)$  satisfies Assumptions 3.2 and 3.4, then for any  $w \in \mathbb{R}^d$  such that  $\|\nabla F(w)\| \leq K$  and  $\alpha < \frac{1}{4L}$ , it holds that  $\|\nabla f(w)\| \leq \frac{16}{7}K + \frac{9}{7}\sigma$ .*

*Proof.* Notice that

$$\begin{aligned} \|\nabla f(w)\| &= \|\mathbb{E}_{i \sim p} f_i(w)\| \\ &= \|\mathbb{E}_{i \sim p} [\nabla F_i(w) + (\nabla f_i(w) - \nabla F_i(w))]\| \\ &\leq \|\nabla F(w)\| + \|\mathbb{E}_{i \sim p} (I_d - A_i(w) A_i(\tilde{w}_i)) \nabla f_i(w)\| \\ &\leq \|\nabla F(w)\| + \mathbb{E}_{i \sim p} \|I_d - A_i(w) A_i(\tilde{w}_i)\| \|\nabla f_i(w)\| \\ &\leq \|\nabla F(w)\| + (2\alpha L + \alpha^2 L^2) \mathbb{E}_{i \sim p} \|\nabla f_i(w)\|, \end{aligned}$$

where the first inequality follows from triangular inequality and the third inequality is due to Assumption 3.2. Similarly, we have

$$\begin{aligned}\mathbb{E}_{i \sim p} \|\nabla f_i(w)\| &\leq \|\nabla f(w)\| + \mathbb{E}_{i \sim p} \|\nabla f_i(w) - \nabla f(w)\| \\ &\leq \|\nabla f(w)\| + \sigma,\end{aligned}$$

where the first inequality is due to triangular inequality and the second one is due to Assumption 3.4. Rearrange the terms under the assumption  $\alpha < \frac{1}{4L}$  to get

$$\begin{aligned}\|\nabla f(w)\| &\leq \frac{1}{1 - 2\alpha L - \alpha^2 L^2} \|\nabla F(w)\| + \frac{2\alpha L + \alpha^2 L^2}{1 - 2\alpha L - \alpha^2 L^2} \sigma \\ &\leq \frac{16}{7} K + \frac{9}{7} \sigma.\end{aligned}$$

□

**Lemma D.2.** *Suppose  $f_i(w)$  satisfies Assumptions 3.2, 3.3 and 3.5. For any  $\alpha \leq \min\{\frac{1}{2L}, \frac{\mu}{8\kappa G}\}$  and  $w \in U(G) := \{w \in \mathbb{R}^d : \|\nabla f(w)\| \leq G\}$ , we have  $\frac{\mu}{8} I_d \preceq \text{Hess}(F(w)) \preceq \frac{9L}{8} I_d$ .*

*Proof.* Consider  $w, u \in U(G)$ , we have

$$\begin{aligned}\|\nabla F(w) - \nabla F(u)\| &= \|A(w)\nabla f(w - \alpha\nabla f(w)) - A(u)\nabla f(u - \alpha\nabla f(u))\| \\ &\leq \|(A(w) - A(u))\nabla f(w - \alpha\nabla f(w))\| \\ &\quad + \|A(u)(\nabla f(w - \alpha\nabla f(w)) - \nabla f(u - \alpha\nabla f(u)))\|,\end{aligned}$$

where the inequality follows from triangular inequality. For the first term, we have an upper bound

$$\begin{aligned}\|(A(w) - A(u))\nabla f(w - \alpha\nabla f(w))\| &\leq \|A(w) - A(u)\| \|\nabla f(w - \alpha\nabla f(w))\| \\ &= \alpha \|\nabla^2 f(w) - \nabla^2 f(u)\| \|\nabla f(w - \alpha\nabla f(w))\| \\ &\leq \alpha \kappa \|w - u\| \|\nabla f(w - \alpha\nabla f(w))\| \\ &= \alpha \kappa \|w - u\| \|A(\tilde{w})f(w)\| \\ &\leq \alpha \kappa \|w - u\| \|A(\tilde{w})\| \|f(w)\| \\ &\leq \alpha(1 - \alpha\mu)\kappa G \|w - u\|\end{aligned}$$

where the first inequality is due to Cauchy-Schwarz inequality, the second inequality is due to Assumption 3.5, and the second equality follows from mean value theorem, and the last inequality is due to the fact that  $\|A(\tilde{w})\| = \|I_d - \alpha\nabla^2 f(\tilde{w})\| \leq 1 - \alpha\mu$ . Similarly, we bound the second part as

$$\begin{aligned}\|A(u)(\nabla f(w - \alpha\nabla f(w)) - \nabla f(u - \alpha\nabla f(u)))\| &\leq \|A(u)\| \|\nabla f(w - \alpha\nabla f(w)) - \nabla f(u - \alpha\nabla f(u))\| \\ &\leq (1 - \alpha\mu) \|\nabla f(w - \alpha\nabla f(w)) - \nabla f(u - \alpha\nabla f(u))\| \\ &\leq (1 - \alpha\mu)L \|(w - \alpha\nabla f(w)) - (u - \alpha\nabla f(u))\| \\ &\leq (1 - \alpha\mu)^2 L \|w - u\|,\end{aligned}$$

where the last inequality follows from mean value inequality. Putting the pieces together to get, when  $\alpha \leq \min\{\frac{1}{2L}, \frac{\mu}{8\kappa G}\}$ ,

$$\begin{aligned}\|\nabla F(w) - \nabla F(u)\| &\leq \alpha(1 - \alpha\mu)\kappa G \|w - u\| + (1 - \alpha\mu)^2 L \|w - u\| \\ &\leq \alpha \kappa G \|w - u\| + (1 - \alpha\mu)^2 L \|w - u\| \\ &\leq \left(\frac{\mu}{8} + L\right) \|w - u\| \\ &\leq \frac{9L}{8} \|w - u\|,\end{aligned}$$

and therefore  $\text{Hess}(F(w)) \preceq \frac{9L}{8} I_d$ .

The corresponding lower bound similarly follows from triangular inequality where

$$\begin{aligned} \|\nabla F(w) - \nabla F(u)\| &= \|A(w)\nabla f(w - \alpha\nabla f(w)) - A(u)\nabla f(u - \alpha\nabla f(u))\| \\ &\geq \|A(u)(\nabla f(w - \alpha\nabla f(w)) - \nabla f(u - \alpha\nabla f(u)))\| \\ &\quad - \|(A(w) - A(u))\nabla f(w - \alpha\nabla f(w))\|. \end{aligned}$$

When  $\alpha \leq \min\{\frac{1}{2L}, \frac{\mu}{8\kappa G}\}$ , the first term is lower bounded as

$$\begin{aligned} &\|A(u)(\nabla f(w - \alpha\nabla f(w)) - \nabla f(u - \alpha\nabla f(u)))\| \\ &\geq (1 - \alpha L)\|\nabla f(w - \alpha\nabla f(w)) - \nabla f(u - \alpha\nabla f(u))\| \\ &\geq (1 - \alpha L)\mu\|(w - \alpha\nabla f(w)) - (u - \alpha\nabla f(u))\| \\ &\geq (1 - \alpha L)\mu(\|w - u\| - \alpha\|\nabla f(w) - \nabla f(u)\|) \\ &\geq (1 - \alpha L)^2\mu\|w - u\| \\ &\geq \frac{\mu}{4}\|w - u\|, \end{aligned}$$

where the first inequality follows from  $\lambda_{\min}(A(u)) \geq 1 - \alpha L$ , the second inequality follows from Assumption 3.3, the third inequality is due to triangular inequality, and the last inequality follows from  $\alpha \leq \frac{1}{2L}$ . Hence, it holds that

$$\begin{aligned} \|\nabla F(w) - \nabla F(u)\| &\geq \|A(u)(\nabla f(w - \alpha\nabla f(w)) - \nabla f(u - \alpha\nabla f(u)))\| \\ &\quad - \|(A(w) - A(u))\nabla f(w - \alpha\nabla f(w))\| \\ &\geq \frac{\mu}{4}\|w - u\| - \alpha(1 - \alpha\mu)\kappa G\|w - u\| \\ &\geq \left(\frac{\mu}{4} - \frac{\mu}{8}\right)\|w - u\| \\ &= \frac{\mu}{8}\|w - u\|, \end{aligned}$$

where the last inequality follows from  $\alpha \leq \frac{\mu}{8\kappa G}$ . Thus we obtain  $\text{Hess}(F(w)) \geq \frac{\mu}{8}$ .  $\square$

### Proof of Theorem 3.8

*Proof.* Combining Lemmas D.1 and D.2 shows that

$$\frac{\mu}{8}I_d \preceq \text{Hess}(F(w)) \preceq \frac{9L}{8}I_d,$$

if  $w \in U(K)$  and

$$\alpha \leq \min\left\{\frac{1}{2L}, \frac{\mu}{8\kappa} \frac{7}{16K + 9\sigma}\right\}.$$

$\square$

## E Proof of Theorem 3.9

For  $K > 0$ , we define  $U(K) := \{w \in \mathbb{R}^d : \|\nabla F(w)\| \leq K\}$  and  $V(K) := \{w \in \mathbb{R}^d : f(w) - f(x^*) \leq K\}$  where  $x^*$  is the unique global minimizer of  $f$  (recall that  $f$  is  $\mu$ -strongly convex). Let  $\text{Crit}(F)$  denote the set of critical points of  $F$ . The convexity of  $f$  implies that  $V(K)$  is convex. All critical points of  $F$  are contained in  $U(K)$  for any  $K > 0$ ; in other words

$$\text{Crit}(F) \subseteq U(K), \quad \forall K > 0.$$

**Lemma E.1.** *If the loss function  $f_i(w)$  satisfies Assumptions 3.2 to 3.4,  $\alpha < \frac{1}{4L}$ , then we have*

$$U(K) \subseteq V\left(\frac{1}{98\mu}(16K + 9\sigma)^2\right).$$

*Proof.* Let us pick  $w \in \mathbb{R}^d$  such that  $\|\nabla F(w)\| \leq K$ . Lemma D.1 implies that there exists a constant  $C_1 = \frac{16}{7}K + \frac{9}{7}\sigma$  such that  $\|\nabla f(w)\| \leq C_1$ . Since  $f$  is  $\mu$ -strongly convex, we have

$$f(w) \leq f(x) + \nabla f(x)^\top(w - x) + \frac{1}{2\mu}\|\nabla f(w) - \nabla f(x)\|^2, \quad \forall w, x.$$

Setting  $x$  to the global minimizer  $x^*$  of  $f$  yields

$$f(w) \leq f(x^*) + \frac{1}{2\mu}\|\nabla f(w)\|^2 \leq f(x^*) + \frac{1}{2\mu}C_1^2 = f(x^*) + \frac{1}{98\mu}(16K + 9\sigma)^2.$$

Therefore, we have

$$w \in V\left(\frac{1}{98\mu}(16K + 9\sigma)^2\right).$$

□

**Lemma E.2.** *Under Assumptions 3.2 to 3.4, we have*

$$V(K) \subseteq U\left(\sigma + \sqrt{2LK}\right).$$

*Proof.* Let us rewrite  $\|\nabla F(w)\|$  as below

$$\begin{aligned} \|\nabla F(w)\| &= \|\mathbb{E}_{i \sim p}(I_d - \alpha \nabla^2 f_i(w)) \nabla f_i(w - \alpha f_i(w))\| \\ &= \|\mathbb{E}_{i \sim p}(I_d - \alpha \nabla^2 f_i(w))(I_d - \alpha \nabla^2 f_i(\tilde{w})) \nabla f_i(w)\| \\ &\leq \mathbb{E}_{i \sim p} \|\nabla f_i(w)\| \\ &\leq (\mathbb{E}_{i \sim p} \|\nabla f_i(w) - \nabla f(w)\| + \|\nabla f(w)\|) \\ &\leq \sqrt{\mathbb{E}_{i \sim p} \|\nabla f_i(w) - \nabla f(w)\|^2} + \|\nabla f(w)\| \\ &\leq \sigma + \|\nabla f(w)\|, \end{aligned} \tag{E.1}$$

where the second inequality is because of the mean value theorem. Since  $f$  is  $L$ -smooth, we have

$$f(w) \geq f(x) + \nabla f(x)^\top(w - x) + \frac{1}{2L}\|\nabla f(w) - \nabla f(x)\|^2, \quad \forall x \in \mathbb{R}^d.$$

Since  $f$  is  $\mu$ -strongly convex, there exists a unique global minimum  $x^*$  with  $\nabla f(x^*) = 0$ . Therefore, we obtain

$$f(w) \geq f(x^*) + \frac{1}{2L}\|\nabla f(w)\|^2.$$

Combining the above inequality and (E.1) yields

$$\|\nabla F(w)\| \leq \sigma + \sqrt{2L(f(w) - f(x^*))}.$$

If  $w \in V(K)$ , we get

$$\|F(w)\| \leq \sigma + \sqrt{2LK}.$$

□

Combining Lemmas E.1 and E.2 gives the following corollary.

**Corollary E.3.** *For any  $K > 0$ , if  $\alpha < \frac{1}{4L}$ , we have the following inclusion relations*

$$\text{Crit}(F) \subseteq U(K) \subseteq V\left(\frac{1}{98\mu}(16K + 9\sigma)^2\right) \subseteq U\left(\sigma + \sqrt{\frac{L}{\mu} \frac{16K + 9\sigma}{7}}\right).$$

**Corollary E.4.** For any  $K' \geq \left(\frac{9}{7}\sqrt{\frac{L}{\mu}} + 1\right)\sigma$ , if  $\alpha < \frac{1}{4L}$ , we have the following inclusion relations

$$\text{Crit}(F) \subseteq U \left( \frac{7K' - \sigma \left(9\sqrt{\frac{L}{\mu}} + 7\right)}{16\sqrt{\frac{L}{\mu}}} \right) \subseteq V \left( \frac{(K' - \sigma)^2}{2L} \right) \subseteq U(K')$$

**Lemma E.5.** Under Assumption 3.3, if  $\alpha < \frac{1}{4L}$ , we have  $\text{Crit}(F)$  is non-empty.

*Proof.* First we show that  $F$  is bounded from below. Since every  $f_i$  is strongly convex, it is bounded from below. Recall that  $F(w) = \mathbb{E}_{i \sim p} f_i(w - \alpha \nabla f_i(w))$ . Therefore  $F$  is also bounded from below. Let  $F^* := \inf_{w \in \mathbb{R}^d} F(w)$ . Pick any  $v(0) \in \mathbb{R}^d$  and consider the dynamic defined by

$$\frac{dv(t)}{dt} = -\nabla F(v(t)).$$

Let  $E(t) = F(v(t)) - F^*$ . We have

$$\frac{dE(t)}{dt} = -\|\nabla F(v(t))\|^2.$$

Therefore, we get

$$t \min_{0 \leq s \leq t} \|\nabla F(v(s))\|^2 \leq \int_0^t \|\nabla F(v(s))\|^2 ds = E(0) - E(t) \leq E(0).$$

Thus we obtain

$$\min_{0 \leq s \leq t} \|\nabla F(v(s))\|^2 \leq \frac{E(0)}{t}. \quad (\text{E.2})$$

Define another function

$$u(t) := v \left( \arg \min_{s \in [0, t]} \|\nabla F(v(s))\|^2 \right),$$

where ties can be broken arbitrarily. Eq. (E.2) implies

$$\|\nabla F(u(t))\| \leq \sqrt{\frac{E(0)}{t}}, \quad \forall t \geq 0.$$

Pick any  $K \geq \left(\frac{9}{7}\sqrt{\frac{L}{\mu}} + 1\right)\sigma$ . We have

$$\|\nabla F(u(t))\| \in U(K), \quad \forall t \geq \sqrt{\frac{E(0)}{K}}.$$

Since  $f$  is strongly convex,  $V \left( \frac{(K-\sigma)^2}{2L} \right)$  is convex and non-empty. Thus  $U(K)$  is non-empty and closed. Next, we show that  $U(K)$  is bounded. Lemma E.1 implies  $U(K) \subseteq V \left( \frac{1}{98\mu} (16K + 9\sigma)^2 \right) := V_0$ . Since  $V_0$  is a sublevel set of  $f$  and  $f$  is strongly convex, therefore we get the boundedness of  $V_0$ , which implies the boundedness of  $U(K)$ . Thus  $U(K)$  is compact. Define a sequence  $w_n = u \left( n + \sqrt{\frac{E(0)}{K}} \right)$ , where  $n = 1, 2, 3, \dots$ . We have  $w_n \in U(K)$ . By Bolzano-Weierstrass theorem, there exists a convergent subsequence  $w_{n_i}$ . Let  $w_0 \in U(K)$  be the limit of  $w_{n_i}$ . We have

$$\|\nabla F(w_0)\| = \lim_{i \rightarrow \infty} \|\nabla F(w_{n_i})\| \leq \lim_{i \rightarrow \infty} \sqrt{\frac{E(0)}{n_i + \sqrt{E(0)/K}}} = 0.$$

Therefore we conclude that  $w_0$  is a critical point of  $F$ . □

*Proof of Theorem 3.9.* Since  $f$  is strongly convex,  $V \left( \frac{(K-\sigma)^2}{2L} \right)$  is convex and non-empty. Theorem 3.8 implies that  $F$  is  $\frac{\mu}{8}$ -strongly convex on  $U(K)$  and therefore  $\frac{\mu}{8}$ -strongly convex on its convex subset  $V \left( \frac{(K-\sigma)^2}{2L} \right)$  (by Corollary E.4). Since  $\text{Crit}(F) \neq \emptyset$  (by Lemma E.5), there is a unique critical point which is the minimizer of  $F$  on  $V \left( \frac{(K-\sigma)^2}{2L} \right)$ . Corollary E.4 implies no critical point outside  $V \left( \frac{(K-\sigma)^2}{2L} \right)$ . In fact, the unique critical point is the global minimizer of  $F$ . □
